# Supplementary material
Source: publisher figshare collection journal article supplement (https://gsapubs.figshare.com/articles/dataset/_/12307493)
Supplement: Supplementary file 1 [file 1]

## Sheet: Geochemistry samples and data
IGSN	Sample	Material	Sub-object type	Field name (informal classification)	Parameter	Depth in core	TC	TS	TOC	NAVS	TIC	AVS	diff(C)	diff(S)	Na2O	K2O	CaO	Al2O3	Na	Mg	Al	P	B	Ga	K	Ca	Ti	V	Cr	Mn	Fe	Co	Ni	Cu	Zn	As	Rb	Sr	Zr	Mo	Cd	Cs	Ba	La	Ce	Pr	Nd	Sm	Eu
					Method code		1	1	1	1	1	1	1	1	2	2	2	2	2	2	2	2	2	2	2	2	2	2	2	2	2	2	2	2	2	2	2	2	2	2	2	2	2	2	2	2	2	2	2
					Unit	cm	%	%	%	%	%	%	%	%	mol	mol	mol	mol	ppm	ppm	wt%	ppm	ppm	ppm	ppm	ppm	ppm	ppm	ppm	ppm	wt%	ppm	ppm	ppm	ppm	ppm	ppm	ppm	ppm	ppm	ppm	ppm	ppm	ppm	ppm	ppm	ppm	ppm	ppm
IETNS0001	TN-1	Rock	Powder	Maury gray shale		1506.5	2.32327	2.22367	3.02972	2.64057	0	0	-0.70645	-0.416902	0.00693565	0.0320045	0.00693565	0.102198	3190.4	8236.07	5.51871	615.593			25027.5	16007.5	3575.89	107.236	115.15	104.858	3.08113	7.79245	76.0027	34.1854	144.126	13.613	109.498	137.345	86.4472	4.69277	0.32566	5.79282	420.542	33.3621	53.231	7.60609	30.2302	6.03572	1.18725
IETNS0002	TN-2	Rock	Powder	Maury black shale		1475.75	4.88359	0.449279	7.5307	0.501227	0	0	-2.64711	-0.0519483									122.491	17.6521
IETNS0003	TN-3	Rock	Powder	Maury black shale		1452.5	10.1547	0.220422	9.07407	0.314393	1.08059	0		-0.0939715
IETNS0004	TN-4	Rock	Powder	gray shale		1419.25	1.2208	1.839	3.52704	2.49291	0	0	-2.30624	-0.653909
IETNS0005	TN-5	Rock	Powder	gray shale		1406.5	0.5723	1.5061	2.59646	1.99293	0	0	-2.02416	-0.486832
IETNS0006	TN-6	Rock	Powder	gray shale		1388.75	1.16832	1.90117	3.51337	2.45042	0	0	-2.34505	-0.549252	0.00321824	0.0538464	0.00321824	0.13351	1480.39	5982.84	7.20955	360.77			42107.9	3156.11	3588.14	171.81	74.0934	47.2931	2.84495	48.5763	95.4375	27.8156	65.8524	9.83346	153.061	165.67	85.825	6.54135	0.072889	8.22939	316.64	29.3602	50.1667	5.47956	19.7058	3.57304	0.665831
IETNS0007	TN-7	Rock	Powder	gray shale		1374.25	0.657218	1.58184	2.35202	1.73065	0	0	-1.6948	-0.148807									136.556	21.8102
IETNS0008	TN-8	Rock	Powder	gray shale		1359	2.93808	0.404924	3.41089	0.903766	0	0	-0.472809	-0.498842
IETNS0009	TN-9	Rock	Powder	black shale		1341.25	11.1642	2.07343	10.2879	2.36784	0.876341	0		-0.294411									138.338	14.1788
IETNS000A	TN-10	Rock	Powder	black shale		1324.75	15.712	7.13784	14.7031	7.07758	1.00888	0
IETNS000B	TN-11	Rock	Powder	black shale		1315.75	13.019	6.73555	11.9418	6.61814	1.07721	0
IETNS000C	TN-12	Rock	Powder	black shale		1298.75	13.3947	9.26371	12.5937	9.50179	0.801012	0		-0.238077
IETNS000D	TN-13	Rock	Powder	black shale		1287	13.2715	8.18055	12.5235	8.34045	0.747972	0		-0.159897	0.00288738	0.0368884	0.00288738	0.0943522	1328.2	4549.97	5.09502	307.968	10.2028	15.122	28846.8	1730.09	3108.97	195.233	65.8457	63.3983	7.73011	68.2323	154.744	89.6979	157.594	102.006	101.326	131.672	80.4666	187.02	0.965192	5.82698	244.321	28.1552	55.1681	6.76771	27.7062	6.13662	1.30093
IETNS000E	TN-14	Rock	Powder	black shale		1236.5	11.1514	6.50278	10.5906	6.52898	0.560825	0		-0.0262008
IETNS000F	TN-15	Rock	Powder	black shale		1224.75	9.97208	6.90652	9.52404	6.92592	0.448046	0		-0.0193975
IETNS000G	TN-16	Rock	Powder	black shale		1211.5	9.96222	6.94215	9.896	7.12498	0.0662193	0		-0.182829	0.00299349	0.0336192	0.00299349	0.0860701	1377	4206.68	4.64779	346.822	21.8936	16.2257	26290.2	1829.76	2729.79	177.59	61.8342	65.1445	8.67213	78.3443	209.335	91.6797	219.325	113.085	90.1722	108.245	69.0372	169.05	1.20411	5.14959	220.66	26.4729	53.5331	6.57285	27.2847	6.11762	1.3163
IETNS000H	TN-17	Rock	Powder	black shale		1199.25	11.7431	8.60393	11.2643	8.31161	0.478751	0
IETNS000I	TN-18	Rock	Powder	black shale		1184.5	12.2558	9.48549	12.1392	9.72105	0.116626	0		-0.235559
IETNS000J	TN-19	Rock	Powder	black shale		1173.5	12.5359	10.3826	11.8128	10.0931	0.723088	0
IETNS000K	TN-20	Rock	Powder	black shale		1162	11.3882	8.66166	11.7901	8.11565			-0.401986		0.00363194	0.0367043	0.00363194	0.095321	1670.69	4603.14	5.14733	371.252	7.21107	14.3165	28702.8	1689.26	3113.89	155.829	65.0048	66.0254	7.86833	63.8304	113.98	71.6727	146.588	90.2411	100.343	113.526	76.5258	148.075	0.731307	5.62752	240.829	28.5607	57.4825	6.79772	27.6888	6.02719	1.27222
IETNS000L	TN-21	Rock	Powder	black shale		1136	11.0291	8.01867	11.1258	8.47673	0	0	-0.0966226	-0.458062
IETNS000M	TN-22	Rock	Powder	black shale		1124.5	12.5063	6.99432	11.8612	7.2326	0.645112	0		-0.238284
IETNS000N	TN-23	Rock	Powder	black shale		1108.5	12.2233	9.63546	12.2233	8.76827	0	0
IETNS000O	TN-24	Rock	Powder	black shale		1092.5	12.8889	10.4817	12.4202	9.41154	0.468667	0.139309			0.00386083	0.0302988	0.00386083	0.0844745	1775.98	4324.69	4.56163	424.645	7.75038	14.1574	23693.7	2004.65	2634.84	141.986	58.0099	70.3927	8.23163	40.3139	92.1861	70.2162	120.052	92.5841	87.2071	103.454	65.0334	154.64	0.817752	4.9289	230.831	27.3856	55.8339	6.58097	27.313	6.08326	1.31674
IETNS000P	TN-25	Rock	Powder	black shale		1076	13.0249	8.90578	12.5975	9.002	0.427457	0		-0.0962247
IETNS000Q	TN-26	Rock	Powder	black shale		1057	13.2715	6.35462	12.8872	6.23096	0.384237	0
IETNS000R	TN-27	Rock	Powder	black shale		1038.75	11.0183	5.88626	11.3173	6.33939	0	0	-0.298999	-0.453139	0.00347558	0.0324273	0.00347558	0.0887881	1598.77	8855.07	4.79456	303.235			25358.2	10793.2	2719.62	132.66	66.2574	182.342	4.895	31.3602	76.8761	62.2443	95.3912	53.2929	90.4829	128.211	64.2337	113.406	0.478924	4.85808	223.31	26.4367	52.1583	6.09265	24.9803	5.44166	1.17138
IETNS000S	TN-28	Rock	Powder	black shale		1026.25	10.6544	4.81537	11.0552	5.24	0	0	-0.400801	-0.424632
IETNS000T	TN-29	Rock	Powder	black shale		1009.5	8.60373	3.51868	9.86289	3.96014	0	0	-1.25915	-0.441461									18.0212	12.7477
IETNS000U	TN-30	Rock	Powder	black shale		989.25	9.29975	4.41838	9.24168	4.58667	0.0580696	0		-0.168291
IETNS000V	TN-31	Rock	Powder	black shale		975.5	7.93329	4.03006	7.85663	3.9777	0.0766625	0			0.00306419	0.0291842	0.00306419	0.0796599	1409.53	6205.64	4.30163	270.49			22822	6203.58	2526.96	123.524	73.6288	113.525	4.41018	24.1623	65.8785	60.6372	74.1794	40.7289	81.8931	108.713	60.6531	117.18	0.37873	4.24201	295.61	22.7725	44.841	5.22986	20.9923	4.52701	0.942603
IETNS000W	TN-32	Rock	Powder	black shale		962.5	10.4996	4.54833	10.4816	4.40094	0.0180556	0											14.4644	13.2051
IETNS000X	TN-33	Rock	Powder	black shale		940.25	10.6732	5.17357	11.0178	5.40619	0	0	-0.344629	-0.232615
IETNS000Y	TN-34	Rock	Powder	black shale		924	11.0952	5.14249	11.3589	5.27956	0	0	-0.263682	-0.137076
IETNS000Z	TN-35	Rock	Powder	black shale		908.25	11.8505	5.50687	12.4134	5.81694	0	0	-0.562821	-0.310071	0.00438009	0.0325495	0.00438009	0.0897681	2014.84	5766.62	4.84748	310.044			25453.7	3840.9	2937.42	153.657	82.3233	90.6178	4.85078	43.0208	117.466	79.4563	144.222	52.23	92.1824	94.9426	69.5238	118.503	0.887756	4.86866	236.204	25.2554	49.112	5.64796	22.5568	4.67985	0.987113
IETNS0010	TN-36	Rock	Powder	black shale		897.5	11.7884	5.03733	11.8955	5.38846	0	0	-0.10707	-0.351133									21.2065	15.5487
IETNS0011	TN-37	Rock	Powder	black shale		887.85	12.5654	5.4368	12.8824	5.71365	0	0	-0.316921	-0.276853
IETNS0012	TN-38	Rock	Powder	black shale		876	11.3733	9.55547	11.5378	9.77251	0	0	-0.164476	-0.217035	0.00417019	0.0345654	0.00417019	0.0954353	1918.29	6689.29	5.15351	459.339			27030.1	9494.93	2965.32	156.42	80.377	145.356	4.98011	41.3751	102.357	67.0488	64.5765	48.5227	98.4308	109.208	73.7205	147.618	0.471827	5.18378	249.866	28.0703	54.7295	6.25408	25.2856	5.31361	1.14633
IETNS0013	TN-39	Rock	Powder	black shale		859.75	12.1464	4.7422	9.28888	3.85542	2.85748	0.505471
IETNS0014	TN-40	Rock	Powder	black shale		848.75	11.676	4.29501	11.2908	4.68024	0.385198	0		-0.38523
IETNS0015	TN-41	Rock	Powder	black shale		830	11.7283	4.20175	12.5527	4.40026	0	0	-0.824431	-0.198509									19.661	15.1578
IETNS0016	TN-42	Rock	Powder	black shale		810.25	12.7774	3.98416	13.9569	3.94935	0	0	-1.17944		0.00431657	0.0360683	0.00431657	0.096911	1985.62	5548.55	5.23319	442.345			28205.4	3983.5	3361.97	174.471	62.8418	102.192	4.443	44.8955	142.159	86.3239	142.252	44.2527	98.02	85.9553	89.2051	195.727	1.37751	5.186	255.724	27.5272	53.7365	6.15186	24.6663	5.15027	1.0943
IETNS0017	TN-43	Rock	Powder	black shale		796	12.5043	4.35627	12.1337	4.69001	0.370586	0		-0.333742
IETNS0018	TN-44	Rock	Powder	black shale		780	6.34967	5.785	6.62152	5.90059	0	0	-0.271844	-0.115587	0.00510579	0.0431043	0.00510579	0.120564	2348.66	9277.89	6.51046	247.786			33707.6	9385.58	3928.77	154.287	92.0216	165.939	2.91835	25.955	95.0964	82.2228	78.7108	33.4477	124.022	115.229	91.0314	69.6346	0.48544	6.47362	307.227	30.8236	60.552	6.67741	25.8442	5.21478	1.05587
IETNS0019	TN-45	Rock	Powder	black shale		765.5	5.9164	2.24158	5.40696	2.19066	0.509436	0.0509216											170.038	18.7774
IETNS001A	TN-46	Rock	Powder	black shale		747	12.173	4.67739	11.6377	5.21241	0.535328	0		-0.53502
IETNS001B	TN-47	Rock	Powder	black shale		734.25	9.65694	3.84591	9.20103	3.82538	0.455908	0
IETNS001C	TN-48	Rock	Powder	black shale		717.25	10.1654	4.16467	10.0724	4.59002	0.0929565	0		-0.42535	0.00553825	0.043541	0.00553825	0.123557	2547.6	7611.02	6.67207	236.293			34049	6199.55	3902.85	141.352	74.785	122.503	1.8334	15.055	49.8149	76.6904	78.7869	18.973	127.377	124.569	88.266	20.5607	0.25571	6.5606	312.111	31.2704	62.2249	6.79679	25.9931	5.02559	0.991755
IETNS001D	TN-49	Rock	Powder	gray shale		705.5	2.88868	1.14306	2.91618	1.18532	0	0	-0.0275027	-0.0422636									123.852	20.4031
IETNS001E	TN-50	Rock	Powder	black shale		695.75	5.322	2.31875	5.529	2.73837	0	0	-0.207003	-0.419625
IETNS001F	TN-51	Rock	Powder	gray shale		682.75	0.801859	0.807922	1.67959	0.822068	0	0	-0.87773	-0.0141462
IETNS001G	TN-52	Rock	Powder	gray shale		673	0.851002	1.31538	2.37872	1.3482	0	0	-1.52772	-0.032821	0.00557427	0.0443395	0.00557427	0.12511	2564.16	8340.39	6.75593	200.226			34673.5	8189.76	4154.95	139.116	96.5692	154.43	3.89541	27.5541	83.0128	80.0991	115.934	80.3014	127.841	120.654	98.0091	41.0948	0.762254	6.49416	316.814	30.9918	61.4625	6.6716	25.2733	4.86017	0.952076
IETNS001H	TN-53	Rock	Powder	black shale		658	3.91488	3.09487	4.05435	3.57496	0	0	-0.139476	-0.480085
IETNS001I	TN-54	Rock	Powder	black shale		649	8.29834	3.73212	8.57918	3.65462	0	0	-0.28084										102.85	18.3935
IETNS001J	TN-55	Rock	Powder	black shale		633.5	5.65943	3.19367	5.71981	3.46856	0	0	-0.0603865	-0.274884	0.00586426	0.0519742	0.00586426	0.149392	2697.56	6598.73	8.06715	272.628			40643.8	2468.99	4434.29	148.657	83.6605	62.1424	1.73341	10.0436	32.5029	50.0181	73.3201	15.3555	156.251	164.754	100.453	7.78208	0.218747	8.05222	380.02	37.8092	75.7179	8.22494	30.6731	5.73041	1.10632
IETNS001K	TN-56	Rock	Powder	gray shale		621	2.14499	0.776218	2.15654	1.02604	0	0	-0.0115553	-0.249825
IETNS001L	TN-57	Rock	Powder	gray shale		607.75	3.08127	1.31422	3.08127	1.31422	0	0
IETNS001M	TN-58	Rock	Powder	black shale		594.75	8.88264	7.29566	10.0308	7.31584	0	0	-1.14813	-0.0201882
IETNS001N	TN-59	Rock	Powder	black shale		583.25	6.41998	2.2382	6.17666	2.07461	0.24332	0.163589			0.00546273	0.0388475	0.00546273	0.112972	2512.86	6806.02	6.10047	545.625	33.9691	17.5316	30378.7	4968.08	3394.66	149.335	74.626	118.989	5.7866	30.7496	92.7095	113.525	101.362	44.7785	116.194	110.174	83.9613	49.1486	0.962078	6.24665	295.938	29.2539	61.6689	7.14547	29.675	6.71103	1.43459
IETNS001O	TN-60	Rock	Powder	black shale		576	11.8353	6.28386	12.255	5.85128	0	0	-0.419724
IETNS001P	TN-61	Rock	Powder	black shale		563	12.3937	4.65675	13.0079	4.50643	0	0	-0.614279										67.335	19.6724
IETNS001Q	TN-62	Rock	Powder	black shale		554.5	10.5423	4.77969	10.9438	4.45451	0	0	-0.401414
IETNS001R	TN-63	Rock	Powder	gray shale		541.5	1.42687	2.05734	4.51096	2.06877	0	0	-3.08409	-0.0114254
IETNS001S	TN-64	Rock	Powder	black shale		513.5	15.0681	4.81672	16.1432	4.6712	0	0	-1.07501		0.00429065	0.0450424	0.00429065	0.129807	1973.7	6140.43	7.00959	937.69	52.7913	18.4144	35223.1	7536.93	3544.24	375.836	103.322	74.2036	3.51851	20.8878	176.845	150.233	123.719	32.2082	139.124	123.609	103.173	119.113	0.993448	7.89459	295.073	32.0346	56.8445	6.55564	25.9195	5.39061	1.12514
IETNS001T	TN-65	Rock	Powder	black shale		505	9.49913	3.43569	9.68456	3.46948	0	0	-0.185425	-0.0337876
IETNS001U	TN-66	Rock	Powder	black shale		494.5	6.15016	3.00886	6.46782	3.12015	0	0	-0.317661	-0.111291
IETNS001V	TN-67	Rock	Powder	black shale		482.75	6.61995	4.03948	6.78401	3.73946	0	0	-0.164065										15.3267	10.9008
IETNS001W	TN-68	Rock	Powder	black shale		469.75	13.0833	4.51241	13.7036	4.13589	0	0	-0.620295		0.00488123	0.0353786	0.00488123	0.0924341	2245.37	14745.1	4.99144	4404.01			27666	28741.3	2961.27	188.038	109.071	166.761	2.86632	13.9184	96.9903	106.201	168.199	31.6211	91.1909	164.966	86.9109	34.1625	1.98508	4.95135	224.399	40.7723	81.0273	11.072	47.6416	11.6591	2.59162
IETNS001X	TN-69	Rock	Powder	black shale		458.75	7.79994	2.60242	7.79994	2.60242	0	0
IETNS001Y	TN-70	Rock	Powder	black shale		444	6.15807	2.16063	7.99627	2.68027	0	0	-1.8382	-0.519637									92.133	16.3653
IETNS001Z	TN-71	Rock	Powder	black shale		429	7.75129	2.26649	8.38679	2.26361	0	0.00288249	-0.6355
IETNS0020	TN-72	Rock	Powder	black shale		412.5	6.65535	1.2716	7.12532	1.46909	0	0	-0.469971	-0.197491	0.00386573	0.0368808	0.00386573	0.105657	1778.24	10456.5	5.70548	486.687			28840.8	11443.5	3206.49	177.09	98.4125	83.8036	1.92171	11.4118	103.469	121.092	74.3347	12.6934	111.349	99.073	79.7302	17.8704	0.4367	6.37941	232.401	26.8061	49.6299	5.72712	22.2863	4.60149	0.942136
IETNS0021	TN-73	Rock	Powder	black shale		399.25	8.09375	1.5444	7.5101	1.49448	0.583653	0.0499133											142.191	18.0381
IETNS0022	TN-74	Rock	Powder	black shale		394	8.02568	1.84881	8.02539	1.7333	0.000292305	0.115507
IETNS0023	TN-75	Rock	Powder	black shale		382	3.15493	1.14085	3.2762	1.14875	0	0	-0.121273	-0.00789849
IETNS0024	TN-76	Rock	Powder	black shale		373.5	4.85591	1.01706	5.16493	1.11733	0	0	-0.309022	-0.100273
IETNS0025	TN-77	Rock	Powder	black shale		364.5	4.55657	0.874828	4.48139	0.921095	0.0751814	0		-0.0462674									184.222	22.2445
IETNS0026	TN-78	Rock	Powder	black shale		353.75	3.73764	0.957325	3.79201	0.991843	0	0	-0.0543657	-0.0345177	0.00386771	0.0418795	0.00386771	0.124132	1779.15	10689.5	6.70311	353.817			32749.8	10789	3679.48	167.993	96.1785	93.2058	2.23572	13.1496	86.3	173.146	107.871	13.5453	128.62	114.946	89.0585	9.45208	0.433124	7.42858	262.523	29.0118	55.2261	5.99589	22.5559	4.42945	0.852696
IETNS0027	TN-79	Rock	Powder	black shale		343.5	5.44508	1.99634	6.39339	1.77846	0	0.217877	-0.948306
IETNS0028	TN-80	Rock	Powder	black shale		330.25	6.03749	1.43977	5.96166	2.02756	0.0758366	0		-0.587786									86.3967	12.7666
IETNS0029	TN-81	Rock	Powder	black shale		313.5	6.33137	1.42108	6.33034	1.52264	0.00103599	0		-0.101564
IETNS002A	TN-82	Rock	Powder	black shale			6.61946	1.52403	6.61946	1.52403	0	0
IETNS002B	TN-83	Rock	Powder	black shale		206.75	5.08223	0.80462	5.10905	0.785036	0	0.0195845	-0.0268264
IETNS002C	TN-84	Rock	Powder	black shale		190	7.30764	2.1417	7.48303	2.18911	0	0	-0.175387	-0.047406									86.0414	16.1579
IETNS002D	TN-85	Rock	Powder	black shale		177	8.03326	1.23826	9.0973	1.44518	0	0	-1.06404	-0.20692	0.0039524	0.0414337	0.0039524	0.124914	1818.1	12163.6	6.74537	657.352			32401.1	12735.9	3757.22	214.633	127.858	78.2427	1.87455	13.0079	122.854	153.097	98.0157	10.4579	129.507	108.568	95.5233	28.2827	0.514046	7.60812	262.485	29.8073	57.8884	6.84171	27.2174	5.74337	1.16872
IETNS002E	TN-86	Rock	Powder	black shale		166.5	6.58849	1.13632	6.81908	1.22434	0	0	-0.230582	-0.08802									162.37	20.47
IETNS002F	TN-87	Rock	Powder	black shale		155	7.32894	2.48416	7.32894	2.48416	0	0
IETNS002G	TN-88	Rock	Powder	black shale		140.5	3.88549	0.996408	4.26865	1.14905	0	0	-0.383157	-0.15264
IETNS002H	TN-89	Rock	Powder	black shale		128	6.52578	1.29396	6.77458	1.45634	0	0	-0.248801	-0.162383	0.00386267	0.0391196	0.00386267	0.117123	1776.83	14946.3	6.32462	1924.26	128.035	18.8953	30591.5	21120.1	3333.47	127.342	99.9925	106.883	1.95479	10.985	69.4501	120.833	114.311	11.333	120.635	119.424	85.8108	6.20146	0.455025	6.68547	263.055	32.9274	71.5465	9.025	38.1225	8.82601	1.89085
IETNS002I	TN-90	Rock	Powder	black shale		116.5	6.59072	1.82994	6.58286	1.83893	0.00785819	0		-0.0089933
IETNS002J	TN-91	Rock	Powder	black shale		107.5	5.68312	1.08847	5.33051	1.01496	0.35261	0.0735097
IETNS002K	TN-92	Rock	Powder	black shale		100.5	3.66008	1.23161	3.64294	1.23333	0.0171461	0		-0.00172231
IETNS002L	TN-93	Rock	Powder	black shale		94.75	3.60999	1.42642	3.58296	1.46188	0.0270324	0		-0.0354579	0.00310963	0.040963	0.00310963	0.120372	1430.43	14868.8	6.50007	867.405	151.162	18.6074	32033.1	18285.1	4034.71	127.505	95.3948	94.6597	2.07355	9.94541	59.9882	95.1688	89.7265	11.546	125.737	138.124	110.38	4.21142	0.290682	6.94226	258.48	32.2502	62.7242	7.2114	28.0463	5.91831	1.19728
IETNS002M	TN-94	Rock	Powder	black shale		83	3.47648	1.23604	3.44988	1.23017	0.0266016	0.00587163
IETNS002N	TN-95	Rock	Powder	black shale		77	3.67089	1.91568	3.89074	1.95286	0	0	-0.219852	-0.037176
IETNS002O	TN-96	Rock	Powder	black shale		70	5.24189	1.65689	5.74717	1.83122	0	0	-0.505284	-0.174338
IETNS002P	TN-97	Rock	Powder	black shale		55.25	7.53753	1.68831	8.26889	1.79565	0	0	-0.731363	-0.10734	0.0022035	0.0355201	0.0022035	0.107683	1013.61	19216.7	5.81486	547.104	115.858	17.1832	27776.7	25933.2	3105.96	148.864	81.226	112.277	2.1356	14.0089	93.7212	126.028	195.606	11.4993	110.213	106.899	85.5945	16.6474	1.11413	6.03431	229.013	26.4398	49.2099	5.55469	21.4409	4.45508	0.925077
IETNS002Q	TN-98	Rock	Powder	black shale		46	6.55671	1.79017	7.09897	1.84674	0	0	-0.542264	-0.0565658									139.43	19.4797
IETNS002R	TN-99	Rock	Powder	black shale		30.25	9.04597	0.0552719	9.63228	0.0803315	0	0	-0.58631	-0.0250596
IETNS002S	TN-100	Rock	Powder	black shale		18.75	7.22986	0.0566704	7.65363	0.106318	0	0	-0.423779	-0.0496479
IETNS002T	TN-101	Rock	Powder	gray shale		10.75	1.89237	0.0732519	2.06999	0.134676	0	0	-0.177618	-0.0614244
[truncated: 76 more columns]
