# Supplementary material
Source: publisher figshare collection journal article supplement (https://gsapubs.figshare.com/articles/dataset/_/12307493)

Yi Song, Geoffrey J. Gilleaudeau, Thomas J. Algeo, D. Jeffrey Over, Timothy W. Lyons, Ariel D. Anbar, and Shucheng Xie, 2020, Biomarker evidence of algal-microbial community changes linked to redox and salinity variation, Upper Devonian Chattanooga Shale (Tennessee, USA): GSA Bulletin, <https://doi.org/10.1130/B35543.1>.

## Supplemental Material

**Table S1.** original data of all proxies in this paper and concentration of each element and compound.

**Figure S2.** Mass chromatograms of selected sample showing the distribution of (a) n-alkanes, (b) C27-C29 steranes and diasteranes (m/z 217), (c) Terpane m/z 191 fingerprint, (d) aryl isoprenoids (m/z 133 or 134). Numbers over the peaks identify individual carbon number homologues. Pr-pristane. Ph-phytane.

Figure S2: Mass chromatograms of selected sample showing the distribution of (a) n-alkanes, (b) C27-C29 steranes and diasteranes (m/z 217), (c) Terpane m/z 191 fingerprint, (d) aryl isoprenoids (m/z 133 or 134). Numbers over the peaks identify individual carbon number homologues. Pr-pristane. Ph-phytane.

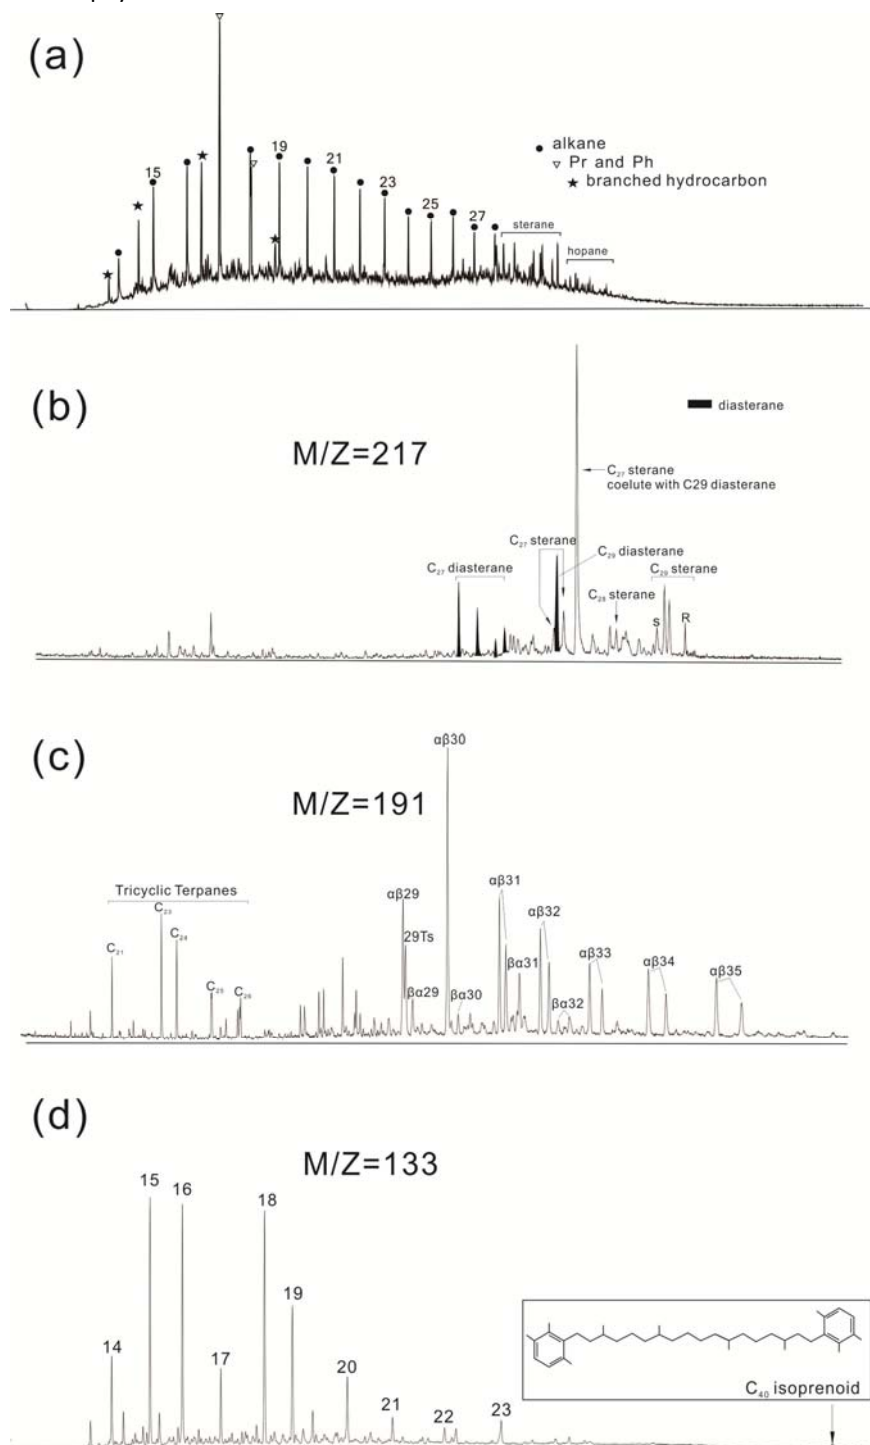

Supplement: Supplementary file 1 [file 1]
